# Supplementary material for: Genome Evolution and Plasticity of Serratia marcescens, an Important Multidrug-Resistant Nosocomial Pathogen
Source: PubMed Central journal article supplement (PMC4231636; doi:10.1093/gbe/evu160), 2014-07-28
Supplement: supp_evu160_SMA_20140717_SuppleTables_igu2.pdf [file supp_evu160_SMA_20140717_SuppleTables_igu2.pdf]

**Table S1. SM39-specific regions that are absent in Db11 (sequence identity:  $\leq 90\%$ , length:  $\geq 5$  kb)**

| Elements | Start   | End     | Size (bp) | Genes          |                                                     |
|----------|---------|---------|-----------|----------------|-----------------------------------------------------|
| SM39_E01 | 226552  | 267390  | 40839     | SM39_0197-0244 | SM39_PP1 (Mu-like)                                  |
| SM39_E02 | 295636  | 307714  | 12079     | SM39_0274-0284 | two-component system                                |
| SM39_E03 | 446028  | 461861  | 15834     | SM39_0421-0439 | T2SS                                                |
| SM39_E04 | 494011  | 503704  | 9694      | SM39_0471-0476 | NRPS                                                |
| SM39_E05 | 511606  | 530321  | 18716     | SM39_0484-0499 | allantoin utilization ( <i>all-glx</i> gene set)    |
| SM39_E06 | 545665  | 598458  | 52794     | SM39_0516-0594 | SM39_PP2 (lambda-like)                              |
| SM39_E07 | 756427  | 761881  | 5455      | SM39_0746-0749 |                                                     |
| SM39_E08 | 945910  | 954763  | 8854      | SM39_0942-0948 |                                                     |
| SM39_E09 | 1030487 | 1050917 | 20431     | SM39_1016-1031 | exopolysaccharide (capsule)                         |
| SM39_E10 | 1060270 | 1071046 | 10777     | SM39_1037-1045 | exopolysaccharide (O-antigen)                       |
| SM39_E11 | 1118420 | 1124755 | 6336      | SM39_1092-1098 |                                                     |
| SM39_E12 | 1262274 | 1297061 | 34788     | SM39_1219-1265 | SM39_PP3                                            |
| SM39_E13 | 1299328 | 1309287 | 9960      | SM39_1270-1280 | fimbrial locus 3                                    |
| SM39_E14 | 1456828 | 1461949 | 5122      | SM39_1436-1439 |                                                     |
| SM39_E15 | 1464099 | 1474246 | 10148     | SM39_1443-1448 | beta-galactosidase ( <i>ebg</i> operon)             |
| SM39_E16 | 1810086 | 1815741 | 5656      | SM39_1778-1782 | microcin                                            |
| SM39_E17 | 1878006 | 1889041 | 11036     | SM39_1844-1855 | serralysin-like protease                            |
| SM39_E18 | 1911520 | 1924983 | 13464     | SM39_1877-1887 | nitrate reductase ( <i>nirBDC-cysG</i> )            |
| SM39_E19 | 1952952 | 1964577 | 11626     | SM39_1912-1918 | pump (RND)                                          |
| SM39_E20 | 1987305 | 1993333 | 6029      | SM39_1936-1940 |                                                     |
| SM39_E21 | 1995876 | 2005506 | 9631      | SM39_1946-1953 |                                                     |
| SM39_E22 | 2138241 | 2152393 | 14153     | SM39_2077-2080 | Cdi system                                          |
| SM39_E23 | 2185446 | 2199489 | 14044     | SM39_2069-2130 | SM39_PP4                                            |
| SM39_E24 | 2628862 | 2639496 | 10635     | SM39_2581      | NRPS                                                |
| SM39_E25 | 2644633 | 2654233 | 9601      | SM39_2586-2597 | fimbrial locus 6                                    |
| SM39_E26 | 2657088 | 2674098 | 17011     | SM39_2602-2615 |                                                     |
| SM39_E27 | 2693415 | 2700533 | 7119      | SM39_2637-2643 |                                                     |
| SM39_E28 | 2720328 | 2749203 | 28876     | SM39_2665-2696 | SM39_IE1, type III RM system, plasmid-related genes |
| SM39_E29 | 2900511 | 2918186 | 17676     | SM39_2837-2855 | SM39_PP5 (lambda-like)                              |
| SM39_E30 | 2949991 | 2959037 | 9047      | SM39_2882      | glycosyltransferase                                 |
| SM39_E31 | 3075958 | 3084814 | 8857      | SM39_3003-3008 | haemin storage system ( <i>hms</i> operon)          |
| SM39_E32 | 3104380 | 3112591 | 8212      | SM39_3028-3034 | fimbrial locus 7                                    |
| SM39_E33 | 3218185 | 3230644 | 12460     | SM39_3139-3145 | Cdi system                                          |
| SM39_E34 | 3390342 | 3396587 | 6246      | SM39_3295-3300 |                                                     |
| SM39_E35 | 3755005 | 3767973 | 12969     | SM39_3638-3650 | fimbrial locus 8                                    |
| SM39_E36 | 3854719 | 3878288 | 23570     | SM39_3729-3758 | SM39_PP6, type I RM system                          |
| SM39_E37 | 4002004 | 4019806 | 17803     | SM39_3884      | NRPS ( <i>swrA</i> -like)                           |
| SM39_E38 | 4227980 | 4234716 | 6737      | SM39_4088-4095 | L-ascorbate utilization ( <i>ula</i> operon)        |
| SM39_E39 | 4254093 | 4263160 | 9068      | SM39_4110-4118 |                                                     |
| SM39_E40 | 4281738 | 4289275 | 7538      | SM39_4138-4145 | fimbrial locus 9                                    |
| SM39_E41 | 4768046 | 4795457 | 27412     | SM39_4574-4613 | SM39_PP7 (P2-like)                                  |
| SM39_E42 | 5047976 | 5070272 | 22297     | SM39_4836-4858 | SM39_IE2, LuxI/R family, type I RM system           |
| SM39_E43 | 5071502 | 5078868 | 7367      | SM39_4862-4873 |                                                     |
| SM39_E44 | 5089692 | 5099882 | 10191     | SM39_4889-4896 |                                                     |

**Table S2. Db11-specific regions that are absent in SM39 (sequence identity: ≤90%, length: ≥5 kb)**

| Element  | Start   | End     | Size (bp) | Genes             |                                                 |
|----------|---------|---------|-----------|-------------------|-------------------------------------------------|
| Db11_E01 | 635131  | 642854  | 7724      | SMDB11_0601-0606  | bacteriocin                                     |
| Db11_E02 | 883180  | 900361  | 17182     | SMDB11_0849-0863  | exopolysaccharide (capsule)                     |
| Db11_E03 | 909728  | 923722  | 13995     | SMDB11_0870-0878  | exopolysaccharide (O-antigen)                   |
| Db11_E04 | 1116229 | 1123942 | 7714      | SMDB11_1052-1058  | fimbrial locus 3                                |
| Db11_E05 | 1165437 | 1175965 | 10529     | SMDB11_101-1108   | DB11_IE1                                        |
| Db11_E06 | 1310880 | 1318663 | 7784      | SMDB11_1251-1257  | pump (RND)                                      |
| Db11_E07 | 1360574 | 1365622 | 5049      | SMDB11_1296-1299  |                                                 |
| Db11_E08 | 1376716 | 1381973 | 5258      | SMDB11_1311-1319  |                                                 |
| Db11_E09 | 1675673 | 1682711 | 7039      | SMDB11_1598-1601  | type IR/M ( <i>hsd</i> operon)                  |
| Db11_E10 | 1693465 | 1700954 | 7490      | SMDB11_1610-1621  | Rhs                                             |
| Db11_E11 | 1718118 | 1724027 | 5910      | SMDB11_1640-1645  | ABC-transporter                                 |
| Db11_E12 | 1734702 | 1747939 | 13238     | SMDB11_1658-1663  | Rhs                                             |
| Db11_E13 | 1788581 | 1794001 | 5421      | SMDB11_1697-1700  | pump (RND)                                      |
| Db11_E14 | 1795619 | 1801415 | 5797      | SMDB11_1702-1710  |                                                 |
| Db11_E15 | 1924070 | 1933713 | 9644      | SMDB11_1815-1823  |                                                 |
| Db11_E16 | 2232481 | 2238239 | 5759      | SMDB11_2122-2126  |                                                 |
| Db11_E17 | 2402661 | 2409472 | 6812      | SMDB11_2277-2281  | Rhs                                             |
| Db11_E18 | 2414889 | 2442511 | 27623     | SMDB11_2288-2293  | NRPS ( <i>alb1-alb6</i> )                       |
| Db11_E19 | 2455828 | 2461047 | 5220      | SMDB11_2303A-2310 |                                                 |
| Db11_E20 | 2543898 | 2552130 | 8233      | SMDB11_2400-2408  | DB11_IE3                                        |
| Db11_E21 | 2556518 | 2588505 | 31988     | SMDB11_2416-2443  |                                                 |
| Db11_E22 | 2748342 | 2787893 | 39552     | SMDB11_2587-2638  | DB11_PP2 (Mu-like)                              |
| Db11_E23 | 3037072 | 3043902 | 6831      | SMDB11_2878-2884  |                                                 |
| Db11_E24 | 3122793 | 3130168 | 7376      | SMDB11_2956-2961  |                                                 |
| Db11_E25 | 3252355 | 3261427 | 9073      | SMDB11_3079-3083  |                                                 |
| Db11_E26 | 3418295 | 3423461 | 5167      | SM3224-3226A      | fimbrial locus 6                                |
| Db11_E27 | 3438262 | 3444382 | 6121      | SMDB11_3241-3244  |                                                 |
| Db11_E28 | 3465167 | 3474140 | 8974      | SMDB11_3265-3271  |                                                 |
| Db11_E29 | 3524742 | 3537481 | 12740     | SMDB11_3326-3337  | <i>sgb</i> operon (L-ascorbate utilization)     |
| Db11_E30 | 3583779 | 3592155 | 8377      | SMDB11_3379-3385  | fimbrial locus 7                                |
| Db11_E31 | 3759689 | 3765569 | 5881      | SMDB11_3533-3540  |                                                 |
| Db11_E32 | 3859441 | 3875909 | 16469     | SMDB11_3637-3654  |                                                 |
| Db11_E33 | 3903165 | 3920880 | 17716     | SMDB11_3680       | NRPS ( <i>swrA</i> )                            |
| Db11_E34 | 4165237 | 4174115 | 8879      | SMDB11_3913-3921  | fimbrial locus 8                                |
| Db11_E35 | 4182201 | 4188451 | 6251      | SMDB11_3927-3933  |                                                 |
| Db11_E36 | 4502272 | 4521338 | 19067     | SMDB11_4212-4228  | bacteriocin-related genes, two component system |
| Db11_E37 | 4762911 | 4789989 | 27079     | SMDB11_4418-4449  | fimbrial locus 9 and locus 10                   |
| Db11_E38 | 4899105 | 4918801 | 19697     | SMDB11_4555-4572  | plasmid-related genes                           |
| Db11_E39 | 4985507 | 4991922 | 6416      | SMDB11_4637-4641  | exopolysaccharide                               |

**Table S3. IS elements identified in SM39 and Db11**

| IS element                        | SM39           | Db11           | Location   | Most similar IS<br>(% DNA<br>sequence<br>identity) <sup>a</sup> | Target site<br>duplication (bp) <sup>b</sup> | Terminal<br>inverted repeat<br>(bp) |
|-----------------------------------|----------------|----------------|------------|-----------------------------------------------------------------|----------------------------------------------|-------------------------------------|
| ISSe1 <sup>c</sup> (IS3 family)   | 6              |                | chromosome | -                                                               | 3                                            | 24                                  |
| ISSe2 <sup>c</sup> (IS4 family)   | 5              |                | chromosome | -                                                               | 10-12                                        | 21                                  |
| ISSe3 <sup>c</sup> (IS3 family)   |                | 2              | chromosome | -                                                               | ND                                           | 17                                  |
| IS10L (IS4 family)                | 1              |                | chromosome | -                                                               | 9                                            | 22                                  |
| ISSe4 <sup>c</sup> (IS3 family)   | 1              |                | chromosome | ISEc31 (87%)                                                    | ND                                           | 24                                  |
| ISSe5 <sup>c</sup> (IS3 family)   | 1 <sup>d</sup> | 1 <sup>d</sup> | chromosome | ISEc14 (92%)                                                    | ND                                           | 26                                  |
| ISSe6 <sup>c</sup> (IS256 family) | 1              |                | chromosome | IS1414 (85%)                                                    | 8                                            | 30                                  |
| ISSe7 <sup>c</sup> (IS66 family)  | 1              |                | chromosome | ISEc22 (87%)                                                    | 8                                            | 22                                  |
| ISSe8 <sup>c</sup> (IS4 family)   |                | 1              | chromosome | ISCro6 (88%)                                                    | ND                                           | 19/20                               |
| ISSe9 <sup>c</sup> (IS3 family)   |                | 1              | chromosome | ISRaq1 (93%)                                                    | ND                                           | 21/22                               |
| ISCR1 (IS91-like)                 | 1              |                | pSMC1      | -                                                               | ND                                           | ND                                  |
| total                             | 17             | 5              |            |                                                                 |                                              |                                     |

<sup>a</sup> -; the closest IS shows less than 70% nucleotide sequence identity.

<sup>b</sup> ND; not defined.

<sup>c</sup> These IS elements were newly identified in this study.

<sup>d</sup> These two IS elements show 96.7% nucleotide sequence identity.

**Table S4. Prophages and integrative elements of SM39 and Db11**

| Name     | Length (bp) | Start position | End position | Insertion site          | type <sup>a</sup> | Direct repeat (bp) | Features                                     |
|----------|-------------|----------------|--------------|-------------------------|-------------------|--------------------|----------------------------------------------|
| SM39     |             |                |              |                         |                   |                    |                                              |
| SM39_PP1 | 38404       | 226473         | 264876       | SM39_0196/SM39_0243     | PP                | ND                 | Mu-like phage                                |
| SM39_PP2 | 45019       | 545889         | 590907       | <i>arg</i> (tRNA)       | PP                | 47                 | lambda-like phage                            |
| SM39_PP3 | 34800       | 1262262        | 1297061      | SM39_1218/SM39_1266     | PP                | 12                 |                                              |
| SM39_PP4 | 14044       | 2185446        | 2199489      | <i>rluB/Se2131</i>      | PP                | 16                 |                                              |
| SM39_PP5 | 17245       | 2900955        | 2918199      | <i>thr</i> (tRNA)       | PP                | 11                 | lambda-like phage (defective), integrase (-) |
| SM39_PP6 | 22292       | 3855402        | 3877693      | <i>met</i> (tRNA)       | PP                | 29                 | type I RM system                             |
| SM39_PP7 | 27459       | 4767999        | 4795457      | <i>cpxP_fieF</i>        | PP                | 30                 | P2-like phage                                |
| SM39_IE1 | 28901       | 2720303        | 2749203      | <i>asn</i> (tRNA)       | IE                | 28                 | type III RM system, plasmid-related genes    |
| SM39_IE2 | 10865       | 5059408        | 5070272      | <i>leu</i> (tRNA)       | IE                | ND                 | type I RM system                             |
| Db11     |             |                |              |                         |                   |                    |                                              |
| DB11_PP1 | 4172        | 1238874        | 1243045      | <i>ptsG/SMDB11_1178</i> | PP                | ND                 | P2-like (partial)                            |
| DB11_PP2 | 39599       | 2748295        | 2787893      | <i>pro</i> (tRNA)       | PP                | 47                 | Mu-like                                      |
| DB11_IE1 | 6168        | 1165432        | 1171599      | <i>gly</i> (tRNA)       | IE                | ND                 |                                              |
| DB11_IE2 | 2312        | 1278868        | 1281179      | SMDB11_1216/SMDB11_1219 | IE                | ND                 |                                              |
| DB11_IE3 | 8255        | 2543876        | 2552130      | <i>asn</i> (tRNA)       | IE                | 22                 |                                              |
| DB11_IE4 | 1380        | 4975064        | 4976444      | <i>leu</i> (tRNA)       | IE                | ND                 |                                              |

<sup>a</sup> PP; prophages, IE; integrative elements that encode an integrase but not other phage-related functions.

**Table S5. Secreted or surface-exposed proteins of known or predictable functions**

| SM39                                              | Db11        | Gene         | Product                                                            | Amino-acid sequence identity between SM39 and Db11 | Prevalence of homologues in other <i>Serratia</i> strains |                            |                             |                              |
|---------------------------------------------------|-------------|--------------|--------------------------------------------------------------------|----------------------------------------------------|-----------------------------------------------------------|----------------------------|-----------------------------|------------------------------|
|                                                   |             |              |                                                                    |                                                    | <i>S. plymuthica</i> AS9                                  | <i>S. plymuthica</i> 4Rx13 | <i>S. odorifera</i> DSM4582 | <i>S. proteamaculans</i> 568 |
| <b>Predictable signal peptide (+)</b>             |             |              |                                                                    |                                                    |                                                           |                            |                             |                              |
| SM39_0386                                         | -           | -            | hemagglutinin-like protein                                         | -                                                  | -                                                         | -                          | -                           | -                            |
| SM39_1283                                         | SMDB11_1061 | -            | putative nuclease                                                  | 100.0%                                             | +                                                         | +                          | +                           | +                            |
| -                                                 | SMDB11_1670 | -            | extracellular serine protease (with autotransporter domain)        | -                                                  | -                                                         | -                          | -                           | -                            |
| SM39_2024                                         | SMDB11_1844 | -            | putative secreted serine protease                                  | 97.8%                                              | +                                                         | +                          | +                           | +                            |
| SM39_2079                                         | -           | -            | CdiA-family protein                                                | -                                                  | -                                                         | -                          | +                           | +                            |
| SM39_2198                                         | SMDB11_1994 | -            | chitinase                                                          | 96.7%                                              | +                                                         | +                          | -                           | +                            |
| SM39_2810                                         | SMDB11_2573 | <i>spr</i>   | predicted peptidase, outer membrane lipoprotein                    | 99.0%                                              | +                                                         | +                          | +                           | +                            |
| SM39_2958                                         | SMDB11_2756 | -            | endonuclease/exonuclease/phosphatase family protein                | 98.3%                                              | +                                                         | +                          | -                           | +                            |
| SM39_3079                                         | SMDB11_2863 | -            | serine protease                                                    | 98.6%                                              | -                                                         | -                          | -                           | +                            |
| SM39_3125                                         | SMDB11_2916 | -            | putative exported peptidase                                        | 99.2%                                              | +                                                         | +                          | +                           | +                            |
| SM39_3144                                         | -           | -            | CdiA-family protein                                                | -                                                  | -                                                         | +                          | -                           | -                            |
| SM39_3279                                         | SMDB11_3069 | <i>phlA</i>  | extracellular phospholipase A1                                     | 98.1%                                              | +                                                         | +                          | -                           | +                            |
| SM39_3936                                         | SMDB11_3737 | <i>shlA</i>  | hemolysin                                                          | 95.3%                                              | +                                                         | +                          | -                           | +                            |
| SM39_4178                                         | SMDB11_3961 | <i>ssph2</i> | extracellular serine protease SSP-h2 (with autotransporter domain) | 96.8%                                              | +                                                         | +                          | -                           | +                            |
| SM39_4309                                         | SMDB11_4295 | <i>pldA</i>  | outer membrane phospholipase A                                     | 98.6%                                              | +                                                         | +                          | +                           | +                            |
| SM39_4347                                         | SMDB11_4259 | -            | putative exported zinc-protease                                    | 98.8%                                              | +                                                         | +                          | +                           | +                            |
| SM39_4365                                         | SMDB11_4243 | <i>chiA</i>  | endo-chitinase                                                     | 98.9%                                              | +                                                         | +                          | +                           | +                            |
| SM39_4420                                         | SMDB11_4176 | <i>estA</i>  | lipase/esterase (with autotransporter domain)                      | 97.7%                                              | +                                                         | +                          | +                           | +                            |
| SM39_4935                                         | SMDB11_4679 | -            | putative phospholipase                                             | 97.6%                                              | +                                                         | +                          | +                           | +                            |
| SM39_3091                                         | SMDB11_2877 | <i>cbp</i>   | chitin binding protein                                             | 98.5%                                              | +                                                         | +                          | +                           | +                            |
| <b>Predictable signal peptide (-)<sup>a</sup></b> |             |              |                                                                    |                                                    |                                                           |                            |                             |                              |
| SM39_0641                                         | SMDB11_0468 | <i>chiC</i>  | chitinase                                                          | 95.8%                                              | +                                                         | +                          | +                           | +                            |
| SM39_1031                                         | SMDB11_0863 | <i>slaA</i>  | surface layer protein                                              | 77.2%                                              | -                                                         | -                          | -                           | -                            |
| -                                                 | SMDB11_1367 | -            | extracellular metalloproteinase (serralysin family)                | -                                                  | -                                                         | -                          | -                           | -                            |
| SM39_1673                                         | SMDB11_1483 | -            | extracellular lipase                                               | 96.6%                                              | +                                                         | +                          | +                           | +                            |
| SM39_1793                                         | SMDB11_1606 | -            | extracellular metalloproteinase (serralysin family)                | 99.3%                                              | -                                                         | -                          | -                           | -                            |
| SM39_1845                                         | -           | -            | extracellular metalloproteinase (serralysin family)                | -                                                  | -                                                         | +                          | -                           | +                            |
| SM39_2716                                         | SMDB11_2486 | -            | extracellular metalloproteinase (serralysin family)                | 92.8%                                              | -                                                         | -                          | -                           | -                            |
| SM39_3089                                         | SMDB11_2875 | <i>chiB</i>  | chitinase                                                          | 98.4%                                              | +                                                         | +                          | -                           | +                            |
| SM39_3192                                         | SMDB11_2982 | -            | autotransporter domain-containing protein                          | 96.9%                                              | +                                                         | +                          | +                           | +                            |
| SM39_4179                                         | SMDB11_3962 | <i>ssph1</i> | extracellular serine protease SSP-h1 (with autotransporter domain) | 95.8%                                              | +                                                         | +                          | +                           | +                            |
| SM39_4293                                         | SMDB11_4311 | -            | serralysin precursor                                               | 99.4%                                              | +                                                         | +                          | +                           | +                            |
| <b>Type VI secretion system-associated</b>        |             |              |                                                                    |                                                    |                                                           |                            |                             |                              |
| SM39_2481                                         | SMDB11_2263 | <i>hcp1</i>  | Hcp homologue                                                      | 100.0%                                             | -                                                         | -                          | +                           | +                            |
| -                                                 | SMDB11_3455 | <i>hcp2</i>  | Hcp homologue                                                      | -                                                  | -                                                         | -                          | +                           | +                            |
| -                                                 | SMDB11_3456 | <i>hcp3</i>  | Hcp homologue                                                      | -                                                  | -                                                         | -                          | -                           | -                            |
| SM39_2462                                         | SMDB11_2244 | <i>vgrG1</i> | VgrG homologue                                                     | 96.8%                                              | -                                                         | -                          | -                           | -                            |
| SM39_2495                                         | SMDB11_2276 | <i>vgrG2</i> | VgrG homologue                                                     | 98.9%                                              | -                                                         | -                          | +                           | +                            |
| SM39_2480                                         | SMDB11_2261 | <i>ssp1</i>  | Type VI secreted amidase effector                                  | 98.2%                                              | -                                                         | -                          | -                           | -                            |
| -                                                 | SMDB11_2264 | <i>ssp2</i>  | Type VI secreted amidase effector <sup>b</sup>                     | -                                                  | -                                                         | -                          | -                           | -                            |
| SM39_2482                                         | -           | -            | Putative secreted amidase effector <sup>b</sup>                    | -                                                  | -                                                         | -                          | -                           | -                            |

<sup>a</sup> Although the presence of signal peptides were not predicted for these gene products by the SignalP program, their localizations (surface-exposed or secreted) were predicted from the experimental data of the homologs in other *S. marcescens* strains. For example, SSP-H1 has been shown to be localized in outer membrane (Ohnishi Y. et al., J. Biochem., 121(5): 902-913, 1996).

<sup>b</sup> SMDB11\_2264 shows 42.0% amino-acid sequence identity to SM39\_2482

**Table S6. Flagellar biosynthesis- and chemotaxis-related genes in the genomes of SM39 and Db11**

| function                             | locus tag<br>( <i>E. coli</i><br>K-12) | gene        | product                                                                                                                                           | orthologs in <i>Serratia marcescens</i> |             | amino acid<br>sequence identity<br>between<br>SM39 and Db11 |
|--------------------------------------|----------------------------------------|-------------|---------------------------------------------------------------------------------------------------------------------------------------------------|-----------------------------------------|-------------|-------------------------------------------------------------|
|                                      |                                        |             |                                                                                                                                                   | SM39                                    | Db11        |                                                             |
|                                      | b1070                                  | <i>figN</i> | export chaperone for FigK and FigL                                                                                                                | SM39_2435                               | SMDB11_2222 | 98.6                                                        |
|                                      | b1071                                  | <i>figM</i> | anti-sigma factor for FliA (sigma 28)                                                                                                             | SM39_2434                               | SMDB11_2221 | 97.1                                                        |
|                                      | b1072                                  | <i>figA</i> | assembly protein for flagellar basal-body periplasmic P ring                                                                                      | SM39_2433                               | SMDB11_2220 | 96.8                                                        |
|                                      | b1073                                  | <i>figB</i> | flagellar component of cell-proximal portion of basal-body rod                                                                                    | SM39_2432                               | SMDB11_2219 | 97.8                                                        |
|                                      | b1074                                  | <i>figC</i> | flagellar component of cell-proximal portion of basal-body rod                                                                                    | SM39_2431                               | SMDB11_2218 | 100                                                         |
|                                      | b1075                                  | <i>figD</i> | flagellar hook assembly protein                                                                                                                   | SM39_2430                               | SMDB11_2217 | 99.1                                                        |
|                                      | b1076                                  | <i>figE</i> | flagellar hook protein                                                                                                                            | SM39_2429                               | SMDB11_2216 | 96.8                                                        |
|                                      | b1077                                  | <i>figF</i> | flagellar component of cell-proximal portion of basal-body rod                                                                                    | SM39_2428                               | SMDB11_2215 | 99.6                                                        |
|                                      | b1078                                  | <i>figG</i> | flagellar component of cell-distal portion of basal-body rod                                                                                      | SM39_2427                               | SMDB11_2214 | 100                                                         |
|                                      | b1079                                  | <i>figH</i> | flagellar protein of basal-body outer-membrane L ring                                                                                             | SM39_2426                               | SMDB11_2213 | 100                                                         |
|                                      | b1080                                  | <i>figI</i> | predicted flagellar basal body protein                                                                                                            | SM39_2425                               | SMDB11_2212 | 100                                                         |
|                                      | b1081                                  | <i>figJ</i> | muramidase                                                                                                                                        | SM39_2424                               | SMDB11_2211 | 99                                                          |
|                                      | b1082                                  | <i>figK</i> | flagellar hook-filament junction protein 1                                                                                                        | SM39_2423                               | SMDB11_2209 | 99.1                                                        |
|                                      | b1083                                  | <i>figL</i> | flagellar hook-filament junction protein                                                                                                          | SM39_2422                               | SMDB11_2208 | 98.8                                                        |
|                                      | b1879                                  | <i>flhA</i> | predicted flagellar export pore protein                                                                                                           | SM39_2441                               | SMDB11_2225 | 99.4                                                        |
|                                      | b1880                                  | <i>flhB</i> | predicted flagellar export pore protein                                                                                                           | SM39_2442                               | SMDB11_2226 | 99.5                                                        |
|                                      | b1889                                  | <i>motB</i> | protein that enables flagellar motor rotation                                                                                                     | SM39_2453                               | SMDB11_2235 | 94.1                                                        |
|                                      | b1890                                  | <i>motA</i> | proton conductor component of flagella motor                                                                                                      | SM39_2454                               | SMDB11_2236 | 100                                                         |
|                                      | b1891                                  | <i>flhC</i> | DNA-binding transcriptional dual regulator with FliH                                                                                              | SM39_2455                               | SMDB11_2237 | 100                                                         |
|                                      | b1892                                  | <i>flhD</i> | DNA-binding transcriptional dual regulator with FliC                                                                                              | SM39_2456                               | SMDB11_2238 | 99.1                                                        |
| flagellar biosynthesis               | b1920                                  | <i>fliY</i> | cystine transporter subunit                                                                                                                       | SM39_2392                               | SMDB11_2182 | 97.4                                                        |
|                                      | b1921                                  | <i>fliZ</i> | predicted regulator of FliA activity                                                                                                              | SM39_2394                               | SMDB11_2184 | 98.2                                                        |
|                                      | b1922                                  | <i>fliA</i> | RNA polymerase, sigma 28 (sigma F) factor                                                                                                         | SM39_2395                               | SMDB11_2185 | 100                                                         |
|                                      | b1923                                  | <i>fliC</i> | flagellar filament structural protein (flagellin)                                                                                                 | SM39_2396                               | SMDB11_2186 | 68.3                                                        |
|                                      | b1924                                  | <i>fliD</i> | flagellar filament capping protein                                                                                                                | SM39_2397                               | SMDB11_2187 | 78                                                          |
|                                      | b1925                                  | <i>fliS</i> | flagellar protein potentiates polymerization                                                                                                      | SM39_2398                               | SMDB11_2188 | 97.8                                                        |
|                                      | b1926                                  | <i>fliT</i> | predicted chaperone                                                                                                                               | SM39_2399                               | SMDB11_2189 | 100                                                         |
|                                      | b1937                                  | <i>fliE</i> | flagellar basal-body component                                                                                                                    | SM39_2405                               | SMDB11_2194 | 98.1                                                        |
|                                      | b1938                                  | <i>fliF</i> | flagellar basal-body MS-ring and collar protein                                                                                                   | SM39_2406                               | SMDB11_2195 | 98.2                                                        |
|                                      | b1939                                  | <i>fliG</i> | flagellar motor switching and energizing component                                                                                                | SM39_2407                               | SMDB11_2196 | 99.4                                                        |
|                                      | b1940                                  | <i>fliH</i> | flagellar biosynthesis protein                                                                                                                    | SM39_2408                               | SMDB11_2197 | 97                                                          |
|                                      | b1941                                  | <i>fliI</i> | flagellum-specific ATP synthase                                                                                                                   | SM39_2409                               | SMDB11_2198 | 99.8                                                        |
|                                      | b1942                                  | <i>fliJ</i> | flagellar protein                                                                                                                                 | SM39_2410                               | SMDB11_2199 | 98                                                          |
|                                      | b1943                                  | <i>fliK</i> | flagellar hook-length control protein                                                                                                             | SM39_2411                               | SMDB11_2200 | 90.2                                                        |
|                                      | b1944                                  | <i>fliL</i> | flagellar biosynthesis protein                                                                                                                    | SM39_2412                               | SMDB11_2201 | 98.1                                                        |
|                                      | b1945                                  | <i>fliM</i> | flagellar motor switching and energizing component                                                                                                | SM39_2413                               | SMDB11_2202 | 99.7                                                        |
|                                      | b1946                                  | <i>fliN</i> | flagellar motor switching and energizing component                                                                                                | SM39_2414                               | SMDB11_2203 | 98.6                                                        |
|                                      | b1947                                  | <i>fliO</i> | flagellar biosynthesis protein                                                                                                                    | SM39_2415                               | SMDB11_2204 | 98.5                                                        |
|                                      | b1948                                  | <i>fliP</i> | flagellar biosynthesis protein                                                                                                                    | SM39_2416                               | SMDB11_2205 | 99.6                                                        |
|                                      | b1949                                  | <i>fliQ</i> | flagellar biosynthesis protein                                                                                                                    | SM39_2417                               | SMDB11_2206 | 100                                                         |
|                                      | b1950                                  | <i>fliR</i> | flagellar export pore protein                                                                                                                     | SM39_2418                               | SMDB11_2207 | 98.5                                                        |
| chemotaxis-related                   | b1881                                  | <i>cheZ</i> | chemotaxis regulator, protein phosphatase for CheY                                                                                                | SM39_2445                               | SMDB11_2227 | 100                                                         |
|                                      | b1882                                  | <i>cheY</i> | chemotaxis regulator transmitting signal to flagellar motor component                                                                             | SM39_2446                               | SMDB11_2228 | 99.2                                                        |
|                                      | b1883                                  | <i>cheB</i> | fused chemotaxis regulator: protein-glutamate methyltransferase in two-component regulatory system with CheA                                      | SM39_2447                               | SMDB11_2229 | 99.1                                                        |
|                                      | b1884                                  | <i>cheR</i> | chemotaxis regulator, protein-glutamate methyltransferase                                                                                         | SM39_2448                               | SMDB11_2230 | 100                                                         |
|                                      | b1887                                  | <i>cheW</i> | purine-binding chemotaxis protein                                                                                                                 | SM39_2451                               | SMDB11_2233 | 100                                                         |
|                                      | b1888                                  | <i>cheA</i> | fused chemotactic sensory histidine kinase in two-component regulatory system with CheB and CheY: sensory histidine kinase/signal sensing protein | SM39_2452                               | SMDB11_2234 | 95.4                                                        |
| methyl-accepting chemotaxis proteins | na                                     | na          | methyl-accepting chemotaxis protein (PAS*1 & MCP domains)                                                                                         | SM39_0916                               | SMDB11_0747 | 98.4                                                        |
|                                      | na                                     | na          | methyl-accepting chemotaxis protein (TarH*2, HAMP*3 & MCP domains)                                                                                | SM39_1816                               | SMDB11_1636 | 91.7                                                        |
|                                      | b1885                                  | <i>tap</i>  | methyl-accepting chemotaxis protein (TarH, HAMP & MCP domains)                                                                                    | SM39_2449                               | SMDB11_2231 | 99.4                                                        |
|                                      | b1886                                  | <i>tar</i>  | methyl-accepting chemotaxis protein (TarH, HAMP & MCP domains)                                                                                    | SM39_2450                               | SMDB11_2232 | 92.6                                                        |
|                                      | na                                     | na          | methyl-accepting chemotaxis protein (HAMP & MCP domains)                                                                                          | SM39_4406                               | SMDB11_4188 | 96.9                                                        |
|                                      | na                                     | na          | methyl-accepting chemotaxis protein (HAMP & MCP domains)                                                                                          | SM39_4687                               | SMDB11_4458 | 94.4                                                        |
|                                      | na                                     | na          | methyl-accepting chemotaxis protein (HAMP & MCP domains)                                                                                          | SM39_4745                               | SMDB11_4516 | 98.1                                                        |

\*1: domain of internal sensors of oxygen, redox potential, and light

\*2: homologues of the ligand binding domain of Tar (aspartate/maltose chemoreceptor)

\*3: domain of histidine kinases, adenyl cyclases, methyl binding proteins, phosphatases

na: *E. coli* K-12 contains three additional methyl-accepting chemotaxis proteins, trg (b1421), aer (b3072) and tsr (b4355), but their orthologues were not assigned in *S. marcescens*.

**Table S7. SM39 and Db11 genes orthologous to the putative type IV pili-related genes identified/predicted in *E. coli* K-12**

| genes<br>( <i>E. coli</i> K-12) | predicted functions/products<br>( <i>E. coli</i> K-12) | SM39       | Db11         | amino-acid sequence<br>identity between SM39<br>and Db11 |
|---------------------------------|--------------------------------------------------------|------------|--------------|----------------------------------------------------------|
| <i>hofM</i>                     | pilus assembly protein                                 | SM39_4060  | SMDB11_3856  | 96.4%                                                    |
| <i>hofN</i>                     | fimbrial assembly protein                              | SM39_4058A | SMDB11_3855  | 88.8%                                                    |
| <i>hofO</i>                     | membrane protein                                       | SM39_4058  | SMDB11_3854  | 84.4%                                                    |
| <i>hofP</i>                     | hypothetical protein                                   | SM39_4057A | SMDB11_3853  | 92.5%                                                    |
| <i>hofQ</i>                     | fimbrial transporter                                   | SM39_4057  | SMDB11_3852  | 96.9%                                                    |
| <i>pppA</i>                     | prepilin leader peptidase                              | SM39_2364* | SMDB11_2160* | 91.9%                                                    |
| <i>yggR</i>                     | pilus retraction ATPase                                | SM39_3622  | SMDB11_3436  | 96.7%                                                    |
| <i>ppdA</i>                     | prepilin peptidase dependent protein                   | SM39_3423  | SMDB11_3213  | 91.4%                                                    |
| <i>ppdB</i>                     | prepilin peptidase dependent protein                   | SM39_3422  | SMDB11_3212  | 93.8%                                                    |
| <i>ppdC</i>                     | prepilin peptidase dependent protein                   | SM39_3420  | SMDB11_3210  | 96.6%                                                    |
| <i>ppdD</i>                     | major pilin subunit                                    | SM39_0092  | SMDB11_0093  | 93.1%                                                    |
| <i>hofB</i>                     | hypothetical protein                                   | SM39_0091  | SMDB11_0092  | 93.5%                                                    |
| <i>hofC</i>                     | assembly protein in type IV pilin biogenesis           | SM39_0090  | SMDB11_0091  | 95.2%                                                    |

\* Except for these genes, all *S. marcescens* genes are located at the chromosome loci analogous to those in *E. coli* K-12.

**Table S8. Iron uptake systems of *S. marcescens* strains SM39 and Db11**

|                                                                        | SM39                | Db11                    | genes             | products                                                                                                                                                                                                          | Prevalence in other <i>Serratia</i> strains |                               |                                |                              |
|------------------------------------------------------------------------|---------------------|-------------------------|-------------------|-------------------------------------------------------------------------------------------------------------------------------------------------------------------------------------------------------------------|---------------------------------------------|-------------------------------|--------------------------------|------------------------------|
|                                                                        |                     |                         |                   |                                                                                                                                                                                                                   | <i>S. plymuthica</i><br>AS9                 | <i>S. plymuthica</i><br>3Rx13 | <i>S. odorifera</i><br>DSM4581 | <i>proteamaculans</i><br>568 |
| <b>The <i>ent</i> operon and <i>entA</i>- and <i>entD</i>-homologs</b> |                     |                         |                   |                                                                                                                                                                                                                   |                                             |                               |                                |                              |
|                                                                        | SM39_4670~SM39_4674 | SMDB11_4411~SMDB11_4415 | <i>entFSCEB</i>   | enterobactin synthase subunit F, enterobactin exporter, isochorismate synthase, enterobactin synthase subunit E & isochorismatase                                                                                 | +                                           | +                             | +                              | +                            |
|                                                                        | SM39_2650           | SMDB11_2450             | -                 | isochorismatase ( <i>entA</i> homolog)                                                                                                                                                                            | -                                           | -                             | -                              | -                            |
|                                                                        | SM39_2652           | SMDB11_2452             | <i>pswP</i>       | putative 4'-phosphopantetheinyl transferase ( <i>entD</i> homolog)                                                                                                                                                | +                                           | +                             | -                              | +                            |
| <b>A gene cluster for siderophore synthesis</b>                        |                     |                         |                   |                                                                                                                                                                                                                   |                                             |                               |                                |                              |
|                                                                        | SM39_1904~SM39_1907 | SMDB11_1728~SMDB11_1731 | -                 | predicted transporter, siderophore synthetase CbsF homolog, putative siderophore biosynthesis protein & ferric siderophore esterase                                                                               | -                                           | -                             | -                              | -                            |
| <b>The <i>fhu</i> operon</b>                                           |                     |                         |                   |                                                                                                                                                                                                                   |                                             |                               |                                |                              |
|                                                                        | SM39_3571~SM39_3573 | SMDB11_3389~SMDB11_3391 | <i>fhuBDC</i>     | ferrichrome ABC transporter (permease, substrate-binding & ATP-binding proteins)                                                                                                                                  | +                                           | +                             | +                              | +                            |
|                                                                        | SM39_3574           | SMDB11_3392             | <i>fhuA</i>       | ferrichrome outer membrane transporter                                                                                                                                                                            | +                                           | +                             | -                              | -                            |
| <b>The <i>fep</i> operon</b>                                           |                     |                         |                   |                                                                                                                                                                                                                   |                                             |                               |                                |                              |
|                                                                        | SM39_3038~SM39_3041 | SMDB11_2823~SMDB11_2826 | <i>fepBDGC</i>    | ferric siderophore ABC transporter (substrate-binding, permease & ATP-binding proteins)                                                                                                                           | -                                           | -                             | -                              | -                            |
| <b>The <i>fec</i> operon</b>                                           |                     |                         |                   |                                                                                                                                                                                                                   |                                             |                               |                                |                              |
|                                                                        | SM39_1751~SM39_1753 | SMDB11_1561~SMDB11_1563 | <i>fecARI</i>     | ferric citrate outer membrane transporter, transmembrane signal transducer & RNA polymerase sigma factor                                                                                                          | -                                           | -                             | -                              | -                            |
| <b>The <i>has</i> operon</b>                                           |                     |                         |                   |                                                                                                                                                                                                                   |                                             |                               |                                |                              |
|                                                                        | SM39_0339~SM39_0345 | SMDB11_0282~SMDB11_0288 | <i>hasIERADEB</i> | RNA polymerase sigma factor, putative iron sensor protein, TonB-dependent heme receptor, hemophore HasA, heme acquisition ABC transporter (ATP-binding/permease & substrate-binding proteins) & TonB-like protein | -                                           | -                             | -                              | -                            |
| <b>The <i>hem</i> operon</b>                                           |                     |                         |                   |                                                                                                                                                                                                                   |                                             |                               |                                |                              |
|                                                                        | SM39_1627~SM39_1631 | SMDB11_1439~SMDB11_1443 | <i>hemVUTSR</i>   | hemin ABC transporter (ATP-binding, permease & substrate-binding proteins), hemin-degrading protein & TonB-dependent hemin receptor                                                                               | +                                           | +                             | +                              | +                            |
|                                                                        | SM39_1632           | SMDB11_1444             | <i>hemP</i>       | hemin uptake protein                                                                                                                                                                                              | -                                           | -                             | -                              | +                            |
| <b>The <i>hms</i> operon</b>                                           |                     |                         |                   |                                                                                                                                                                                                                   |                                             |                               |                                |                              |
|                                                                        | SM39_3003~SM39_3006 | -                       | <i>hmsSRFH</i>    | hemin storage system (HmsS, HmsR, HmsF & HmsH proteins)                                                                                                                                                           | -                                           | -                             | -                              | -                            |
| <b>Other TonB-dependent receptors/transporters</b>                     |                     |                         |                   |                                                                                                                                                                                                                   |                                             |                               |                                |                              |
|                                                                        | SM39_0195           | SMDB11_0195             | <i>iutA</i>       | TonB-dependent iron siderophore receptor                                                                                                                                                                          | +                                           | +                             | +                              | +                            |
|                                                                        | SM39_0333           | SMDB11_0276             | -                 | TonB-dependent receptor                                                                                                                                                                                           | -                                           | -                             | +                              | +                            |
|                                                                        | SM39_0715           | SMDB11_0544             | -                 | TonB-dependent receptor                                                                                                                                                                                           | -                                           | -                             | -                              | +                            |
|                                                                        | SM39_1900           | SMDB11_1721             | -                 | TonB-dependent copper receptor                                                                                                                                                                                    | -                                           | -                             | -                              | +                            |
|                                                                        | SM39_1908           | SMDB11_1732             | -                 | TonB-dependent ferric siderophore receptor                                                                                                                                                                        | -                                           | -                             | -                              | -                            |
|                                                                        | -                   | SMDB11_1769             | -                 | TonB-dependent receptor                                                                                                                                                                                           | -                                           | -                             | -                              | -                            |
|                                                                        | SM39_2513           | SMDB11_2302             | -                 | TonB-dependent heme receptor                                                                                                                                                                                      | -                                           | -                             | -                              | -                            |
|                                                                        | SM39_2582           | SMDB11_2373             | -                 | TonB-dependent receptor                                                                                                                                                                                           | -                                           | -                             | -                              | +                            |
|                                                                        | SM39_2784           | SMDB11_2548             | -                 | TonB-dependent receptor                                                                                                                                                                                           | +                                           | +                             | +                              | +                            |
|                                                                        | SM39_3043           | -                       | -                 | TonB-dependent ferric siderophore receptor                                                                                                                                                                        | -                                           | -                             | -                              | -                            |
|                                                                        | SM39_3078           | SMDB11_2862             | -                 | TonB-dependent receptor                                                                                                                                                                                           | -                                           | -                             | -                              | -                            |
|                                                                        | SM39_3117           | -                       | -                 | TonB-dependent siderophore receptor                                                                                                                                                                               | -                                           | -                             | -                              | -                            |
|                                                                        | SM39_3501           | SMDB11_3301             | -                 | TonB-dependent receptor                                                                                                                                                                                           | +                                           | +                             | +                              | +                            |
|                                                                        | SM39_3664           | SMDB11_3469             | -                 | TonB-dependent receptor                                                                                                                                                                                           | -                                           | -                             | -                              | -                            |
|                                                                        | SM39_4664           | SMDB11_4405             | -                 | TonB-dependent receptor                                                                                                                                                                                           | +                                           | +                             | -                              | +                            |
|                                                                        | SM39_4667           | SMDB11_4408             | <i>fepA</i>       | iron-enterobactin outer membrane transporter                                                                                                                                                                      | +                                           | +                             | +                              | +                            |
|                                                                        | SM39_4933           | SMDB11_4677             | -                 | TonB-dependent receptor                                                                                                                                                                                           | +                                           | +                             | +                              | +                            |



**Table S9. The list of virulence-attenuated mutants derived from strains Db10 and Db11**

| Mutants           | References <sup>a</sup>  | Tn insertion sites             |                   | Genes or homologues | Known or predicted function | Conservation in SM39 (orthologs in SM39)                                      |               | Conservation in other Serratia strains <sup>b</sup> |                            |                                     |                              | Notes |                                                                                                                                                                                                                      |
|-------------------|--------------------------|--------------------------------|-------------------|---------------------|-----------------------------|-------------------------------------------------------------------------------|---------------|-----------------------------------------------------|----------------------------|-------------------------------------|------------------------------|-------|----------------------------------------------------------------------------------------------------------------------------------------------------------------------------------------------------------------------|
|                   |                          | Db11 CDS                       | Db11 coordinates  |                     |                             | SM39                                                                          | identity (aa) | <i>S. plymuthica</i> AS9                            | <i>S. plymuthica</i> 4Rx13 | <i>S. odorifera</i> DSM4582 (draft) | <i>S. proteamaculans</i> 568 |       |                                                                                                                                                                                                                      |
| JESM272           | this study               | SMDB11_0020                    | 24359             |                     | <i>lysR</i> -like           | gene regulation                                                               | SM39_0022     | 98.1%                                               | +                          | +                                   | -                            | +     |                                                                                                                                                                                                                      |
| 10E5              | Kurz et al.              | SMDB11_0276                    | 297315            |                     |                             | TonB-dependent ferrisiderophore receptor                                      | SM39_0333     | 98.0%                                               | -                          | -                                   | +                            | +     |                                                                                                                                                                                                                      |
| 7A8               | Kurz et al.              | SMDB11_0595                    | 630735            |                     | <i>inhA</i>                 | putative isonitrile hydratase                                                 | SM39_0772     | 96.4%                                               | +                          | +                                   | -                            | -     |                                                                                                                                                                                                                      |
| JESM274           | this study               | SMDB11_0850                    | 885287            |                     | <i>wza</i>                  | exopolysaccharide export                                                      | SM39_1017     | 86.7%                                               | +                          | +                                   | +                            | +     |                                                                                                                                                                                                                      |
| JESM237           | this study               | SMDB11_0872                    | 913110            |                     | <i>manC2</i>                | O-Ag biosynthesis                                                             | -             | na                                                  | (-)                        | (-)                                 | (-)                          | (-)   | SMDB11_0872 is specific to Db11 although SM39_1036 shows 73.3% sequence identity to it. (-); other Serratia also contain genes showing 74-78% identity to SMDB11_0872, but they are not the ortholog of SMDB11_0872. |
| JESM204 & 20C2    | this study & Kurz et al. | SMDB11_0873                    | 914362 & 914398   |                     | <i>wzm</i>                  | O-Ag biosynthesis (O-Ag ABC transporter for LPS biosynthesis)                 | -             | na                                                  | -                          | -                                   | -                            | -     |                                                                                                                                                                                                                      |
| JESM202           | this study               | SMDB11_0876                    | 918777            |                     | <i>wbdA</i>                 | O-Ag biosynthesis                                                             | -             | na                                                  | -                          | -                                   | -                            | -     |                                                                                                                                                                                                                      |
| 8C7               | Kurz et al.              | SMDB11_1112                    | 1178698           |                     |                             | T6SS effector protein of unknown function                                     | SM39_1325     | 98.9%                                               | -                          | -                                   | -                            | -     |                                                                                                                                                                                                                      |
| 3H5               | Kurz et al.              | SMDB11_2114                    | 2224083           |                     | <i>omp</i>                  | outer membrane pore protein (porin)                                           | SM39_2321     | 98.1%                                               | +                          | +                                   | +                            | +     |                                                                                                                                                                                                                      |
| 18F3              | Kurz et al.              | SMDB11_2153                    | 2270917           |                     | <i>wcaG</i> -like           | exopolysaccharide biosynthesis                                                | SM39_2357     | 98.8%                                               | +                          | +                                   | +                            | +     |                                                                                                                                                                                                                      |
| 22D9              | Kurz et al.              | SMDB11_2265                    | 2387534           |                     |                             | T6SS immunity protein                                                         | SM39_2484     | 91.3%                                               | -                          | -                                   | -                            | -     |                                                                                                                                                                                                                      |
| 7D1               | Kurz et al.              | SMDB11_2266                    | 2387867           |                     |                             | T6SS immunity protein                                                         | SM39_2485     | 89.8%                                               | -                          | -                                   | -                            | -     |                                                                                                                                                                                                                      |
| 10F7 & 18D4       | Kurz et al.              | SMDB11_2319                    | 2468154 & 2468156 |                     |                             | unknown                                                                       | SM39_2525     | 97.5%                                               | (+)                        | (+)                                 | (+)                          | +     | (+); 3 strains contain orthologs, but each shows 69%, 69%, 64% identity to SMDB11_2319, respectively (71% for the ortholog of <i>S. proteamaculans</i> 568)                                                          |
| 8H1               | Kurz et al.              | SMDB11_2321                    | 2472147           |                     | <i>mgtB</i>                 | Mg(2+) transport ATPase                                                       | SM39_2527     | 99.0%                                               | +                          | +                                   | +                            | +     |                                                                                                                                                                                                                      |
| 10H1              | Kurz et al.              | SMDB11_2451                    | 2594160           |                     | <i>entC</i>                 | enterobactin synthetase component C                                           | SM39_2651     | 98.5%                                               | -                          | -                                   | -                            | -     |                                                                                                                                                                                                                      |
| JESM273           | this study               | SMDB11_2452                    | 2594732           |                     | <i>entD</i>                 | enterobactin and serrawettin W2 biosynthesis                                  | SM39_2652     | 93.8%                                               | (-)                        | (-)                                 | -                            | (-)   | (-); 3 strains contain genes showing 72-74% identity to SMDB11_2452 but they are not the ortholog of SMDB11_2452.                                                                                                    |
| 10H4              | Kurz et al.              | SMDB11_2632                    | 2783570           |                     |                             | CPS-53 (KpLE1) prophage gene                                                  | -             | na                                                  | +                          | -                                   | -                            | -     | The AS9 homologue shows 94% aa seq identity to SMDB11_2632                                                                                                                                                           |
| JESM266 & JESM271 | this study               | SMDB11_2694                    | 2854582 & 2853500 |                     | <i>nuoG</i>                 | respiratory chain                                                             | SM39_2897     | 99.8%                                               | +                          | +                                   | +                            | +     |                                                                                                                                                                                                                      |
| JESM268           | this study               | SMDB11_2696                    | 2857183           |                     | <i>nuoE</i>                 | respiratory chain                                                             | SM39_2899     | 98.9%                                               | +                          | +                                   | +                            | +     |                                                                                                                                                                                                                      |
| 8E2               | Kurz et al.              | 300 bp upstream of SMDB11_2955 | 3121546           |                     |                             | SMDB11_2955; putative diacylglycerol kinase                                   | SM39_3172     | 97.0%                                               | +                          | +                                   | +                            | +     |                                                                                                                                                                                                                      |
| 7F1               | Kurz et al.              | SMDB11_3029                    | 3199043           |                     |                             | unknown                                                                       | SM39_3239     | 98.6%                                               | -                          | +                                   | -                            | +     |                                                                                                                                                                                                                      |
| JESM270           | this study               | SMDB11_3042                    | 3216592           |                     | <i>purL</i>                 | purine biosynthesis                                                           | SM39_3254     | 99.4%                                               | +                          | +                                   | +                            | +     |                                                                                                                                                                                                                      |
| 7E7               | Kurz et al.              | SMDB11_3228                    | 3426079           |                     | <i>galR</i> -like           | galactose operon repressor                                                    | SM39_3437     | 97.6%                                               | +                          | +                                   | +                            | +     |                                                                                                                                                                                                                      |
| 23C11             | Kurz et al.              | SMDB11_3455                    | 3668381           |                     |                             | T6SS-related, a minor Hcp homologue                                           | -             | na                                                  | -                          | -                                   | (-)                          | (-)   | SM39_2481 shows 66.9% identity to SMDB11_3455, but it encodes the equivalent of the main Db11 Hcp homologue, SMA2263. This is also the case for strains DSM4582 and 568 as indicated by (-).                         |
| JESM135           | this study               | SMDB11_3469                    | 3684635           |                     | <i>fecA</i> -like           | iron uptake                                                                   | SM39_3664     | 98.4%                                               | -                          | -                                   | -                            | -     |                                                                                                                                                                                                                      |
| JESM267           | this study               | SMDB11_3680                    | 3915889           |                     | <i>swrA</i>                 | serrawettin W2 biosynthesis                                                   | -             | na                                                  | -                          | -                                   | -                            | -     | SM39_3884 is present at a locus analogous to that of SMDB11_3680, but shows 55.6% amino-acid sequence identity to SMDB11_3680.                                                                                       |
| 23E6              | Kurz et al.              | SMDB11_3684                    | 3925480           |                     | <i>yjcE</i> -like           | unknown, putative cation/H+ antiporter                                        | SM39_3888     | 99.8%                                               | +                          | +                                   | +                            | +     |                                                                                                                                                                                                                      |
| 21C4              | Kurz et al.              | SMDB11_3736                    | 3978018           |                     | <i>shlBA</i>                | hemolysin production                                                          | SM39_3935     | 97.9%                                               | +                          | +                                   | -                            | +     |                                                                                                                                                                                                                      |
| 22D4              | Kurz et al.              | SMDB11_4162                    | 4447091           |                     | <i>ibpB</i>                 | chaperone IbpB                                                                | SM39_4435     | 100.0%                                              | +                          | +                                   | +                            | +     |                                                                                                                                                                                                                      |
| 8G1               | Kurz et al.              | SMDB11_4219                    | 4511266           |                     |                             | two-component system sensor protein                                           | -             | na                                                  | -                          | -                                   | -                            | -     |                                                                                                                                                                                                                      |
| 21C1              | Kurz et al.              | SMDB11_4556                    | 4902585           |                     |                             | ATPase similar to R64 plasmid IbfA involved in growth inhibition of phage B23 | -             | na                                                  | -                          | -                                   | -                            | -     |                                                                                                                                                                                                                      |

<sup>a</sup> Mutants indicated by "Kurz et al." were identified in a previous screening using Db11 and solid media (Kurz et al., EMBO J, 22:1451-1460, 2003).

<sup>b</sup> The threshold used in this analysis was >70% amino-acid sequence identity and >70% overlap. See the comments for the genes indicated by (-) and (+).
